# Supplementary material for: A mitochondria-targeting ratiometric fluorescent probe for the detection of hypochlorite based on the FRET strategy
Source: Royal Society of Chemistry journal article supplement (doi:10.1039/c7ra11086c), 2017-01-01
Supplement: c7ra11086c1.pdf [file c7ra11086c1.pdf]

## Electronic Supplementary Information

### A mitochondria-targeting ratiometric fluorescent probe for the detection of hypochlorite based on FRET strategy

Shi-Li Shen,<sup>a,\*</sup> Xiao-Fan Zhang,<sup>b</sup> Yan-Qing Ge,<sup>a</sup> Yan Zhu<sup>a</sup> and Xiao-Qun Cao<sup>a,\*</sup>

<sup>a</sup> *School of Chemistry and Pharmaceutical Engineering, Taishan Medical University,  
Taian 271016, P. R. China*

<sup>b</sup> *Taian Center For Food and Drug Control, Taian 271000, P. R. China*

#### Table of Contents

**Fig. S1-S3** <sup>1</sup>H NMR, <sup>13</sup>C NMR and HRMS of **IRP**.

**Fig. S4** The HRMS spectra of the reaction mixture of **IRP** with <sup>-</sup>OCl.

**Fig. S5** Time courses of the fluorescence intensity ratios ( $I_{575}/I_{467}$ ) of **IRP** in the presence of <sup>-</sup>OCl.

**Fig. S6** Fluorescence images of RAW264.7 cells co-stained with **IRP** and Lyso Tracker Deep Red.

**Fig. S7** Effect of **IRP** on the cell viability of RAW264.7 cells.

**Fig. S8** Photostability of **IRP** in RAW264.7 cells at different periods of time.

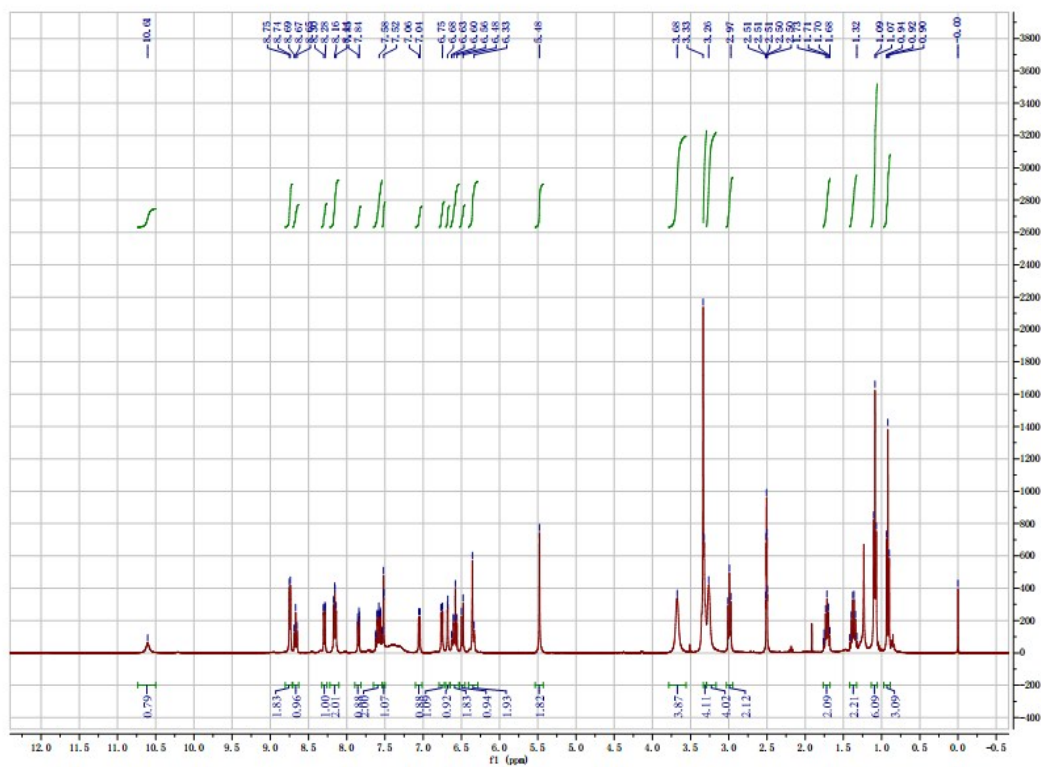

Fig. S1  $^1\text{H}$  NMR spectrum of IRP.

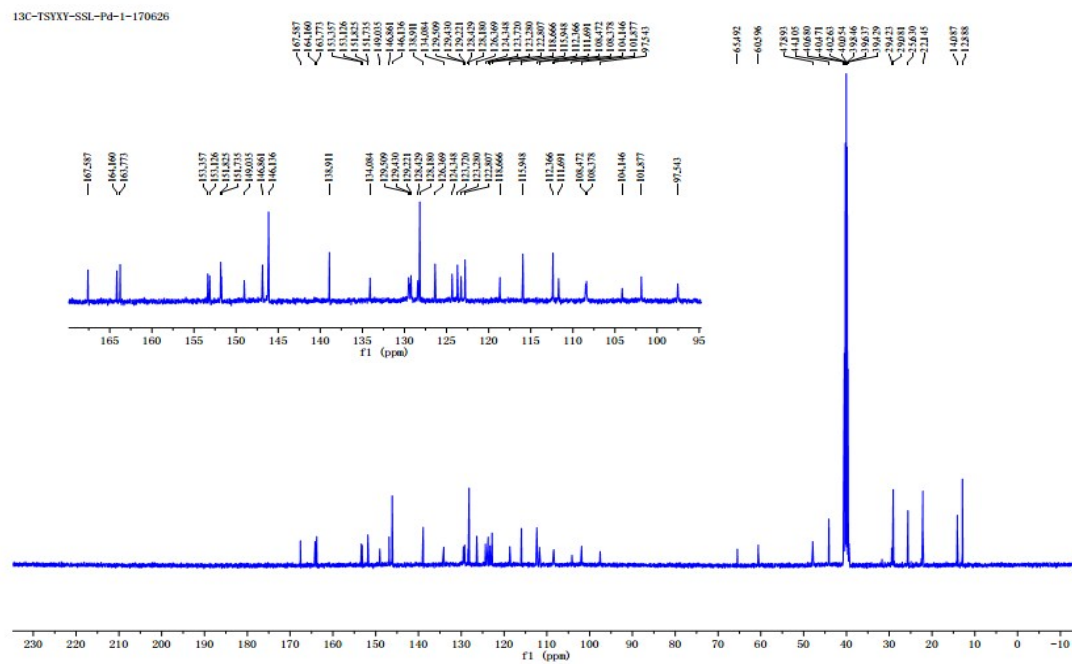

Fig. S2  $^{13}\text{C}$  NMR spectrum of IRP.

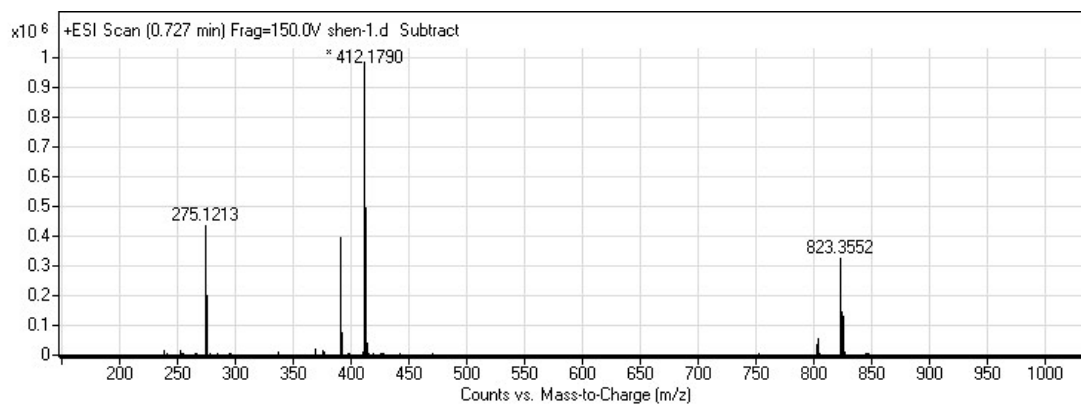

**Fig. S3** HRMS spectrum of **IRP**.

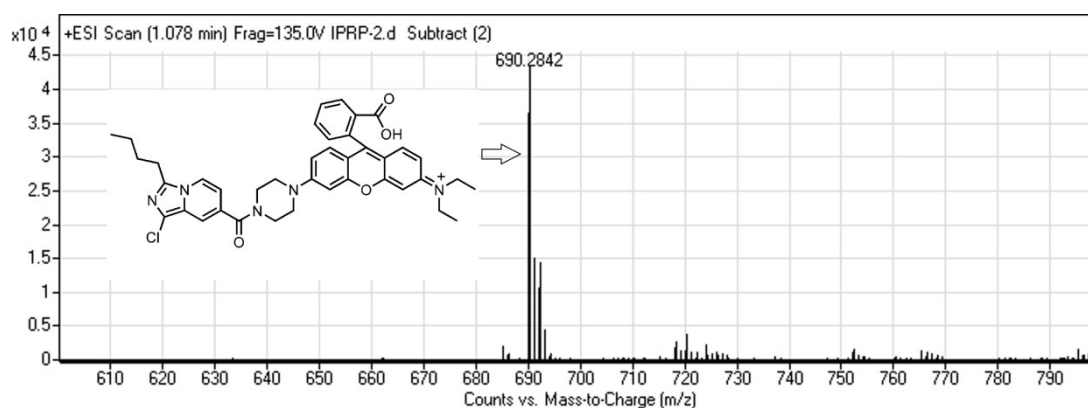

**Fig. S4** The HRMS spectra of the reaction mixture of **IRP** with  $\cdot\text{OCl}$ .

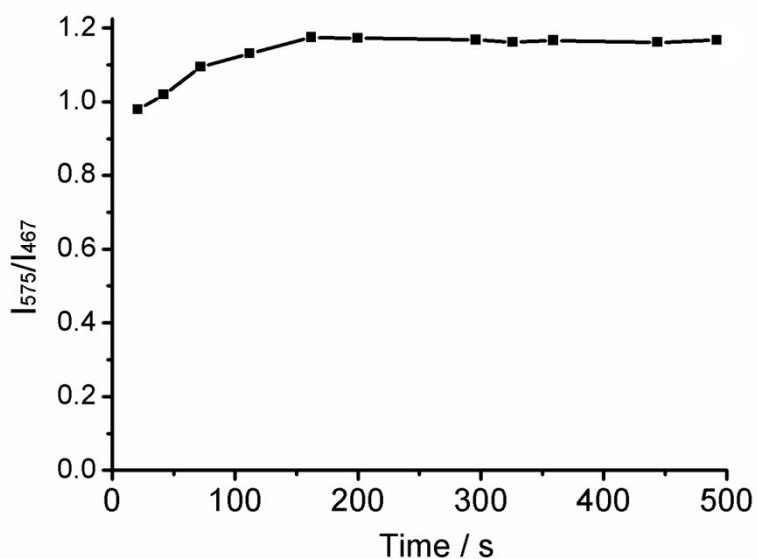

**Fig. S5** Time courses of the fluorescence intensity ratios ( $I_{575}/I_{467}$ ) of **IRP** ( $2\ \mu\text{M}$ ) in the presence of  $\cdot\text{OCl}$  ( $3\ \mu\text{M}$ ).

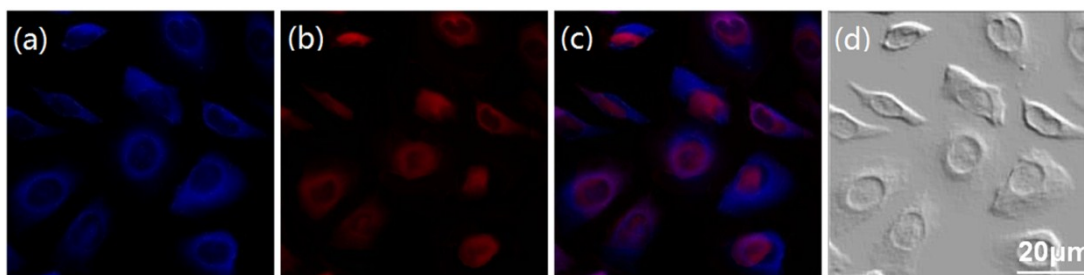

**Fig. S6** Fluorescence images of RAW264.7 cells co-stained with **IRP** (1 μM) and Lyso Tracker Deep Red (0.2 μM). (a) Imidazo[1,5-a]pyridine fluorescence of **IRP**. (b) Fluorescence of Lyso Tracker Deep Red. (c) Overlay of (a) and (b). (d) Bright field images.

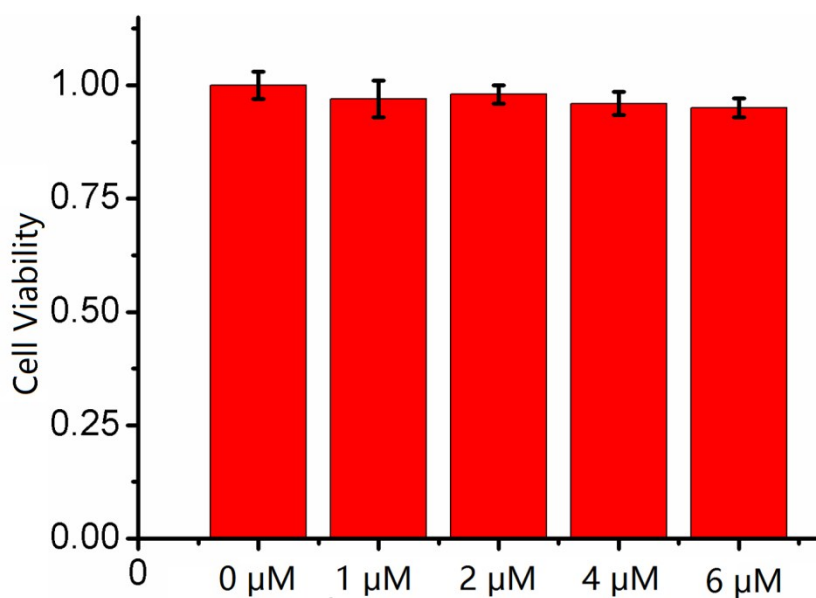

**Fig. S7** Effect of **IRP** on the cell viability of RAW264.7 cells. Cells were incubated with diverse concentrations (1, 2, 4, 6 μM) of **IRP** for 12 h, followed by a standard SRB assay.

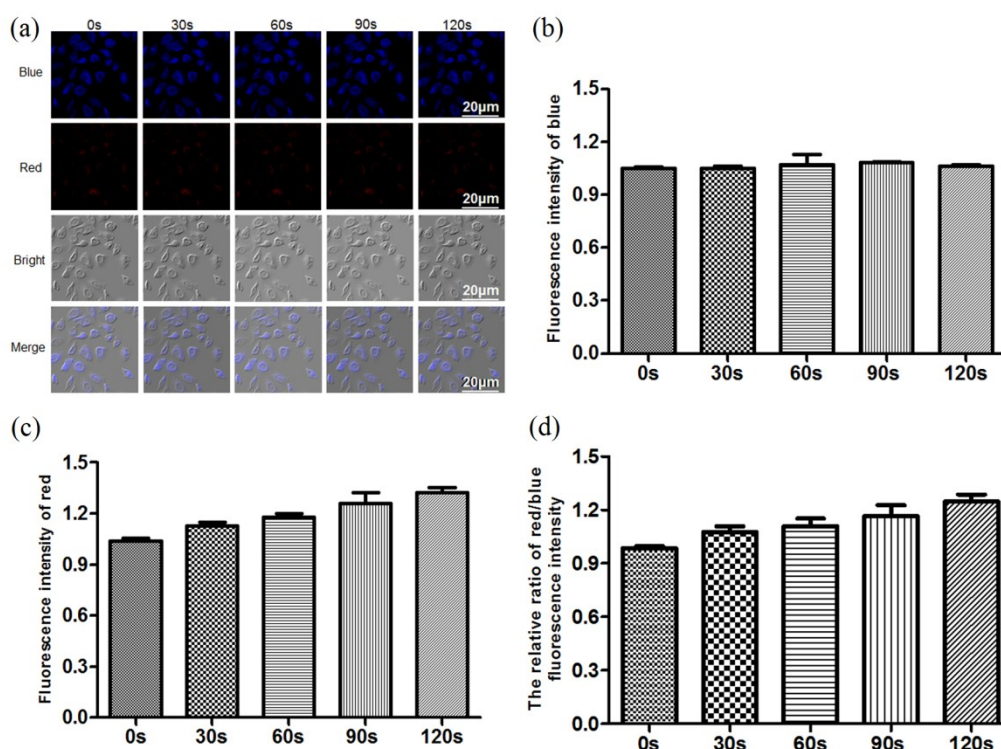

**Fig. S8** Photostability of IRP (1  $\mu\text{M}$ ) in RAW264.7 cells at different periods of time. (a) Fluorescence images of RAW264.7 cells after 0, 30, 60, 90 and 120 s of continuous irradiation. First line: fluorescence images at blue channel (410-520 nm), second line: fluorescence images at red channel (560-700nm), third line: bright field images, fourth line: merge images of first, second and third line. (b) Relative ratio of blue fluorescence intensity (imidazo[1,5-a]pyridine moiety). (c) Relative ratio of red fluorescence intensity (rhodamine moiety). (d) Corresponding relative ratio of red/blue fluorescence intensity [the initial red/blue fluorescence intensity ratio (i.e., at about 0 s) was defined as 1.0]. Fluorescence intensity quantitation was analyzed by the Image J. The results were presented as means  $\pm$  SE with replicates  $n = 3$ .
